# Supplementary material for: Whole genome sequencing of metastatic colorectal cancer reveals prior treatment effects and specific metastasis features
Source: PubMed Central journal article supplement (PMC7835235; doi:10.1038/s41467-020-20887-6), 2021-01-25
Supplement: 41467_2020_20887_MOESM1_ESM.pdf [file 41467_2020_20887_MOESM1_ESM.pdf]

Whole genome sequencing of metastatic colorectal cancer reveals prior treatment effects and specific metastasis features

Supplementary Figures & Tables

# Supplementary Figure 1: Mutual exclusivity in driver genes

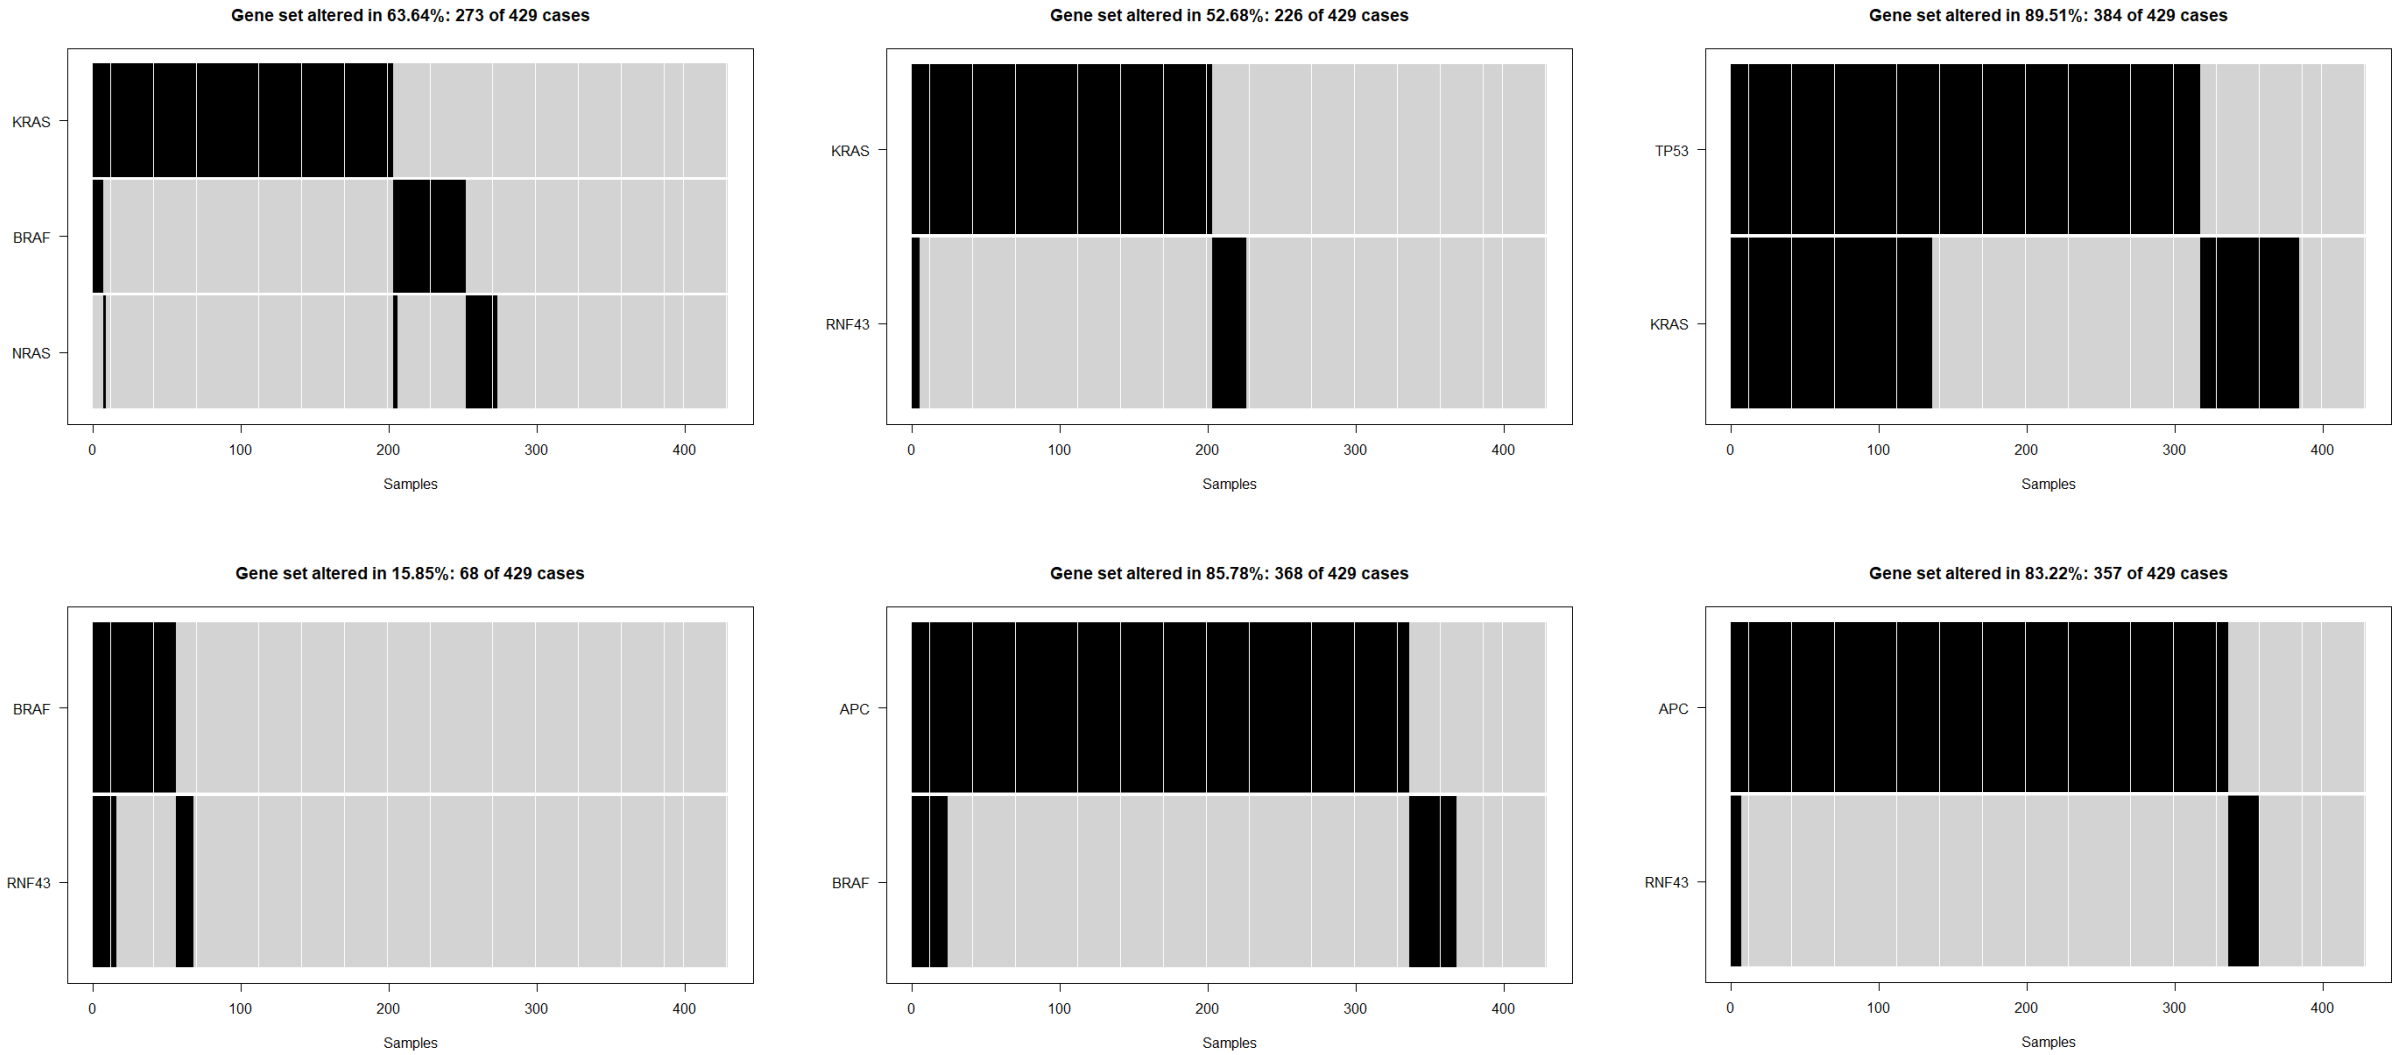

## Supplementary Figure 1: Mutual exclusivity in driver genes

For the indicated genes, the number of mutated metastatic CRC cases are depicted in black. The R package discover v0.9.243 was used to test for mutual exclusivity: KRAS with BRAF/NRAS/RNF43/TP53 ( $q=1.06E-7$ ,  $q=1.54E-4$ ,  $q=0.004$  and  $q=0.017$ , respectively), and APC with RNF43/BRAF (both  $q=1.54E-4$ ).

## Supplementary Figure 2: TIL score over MSI/TMB

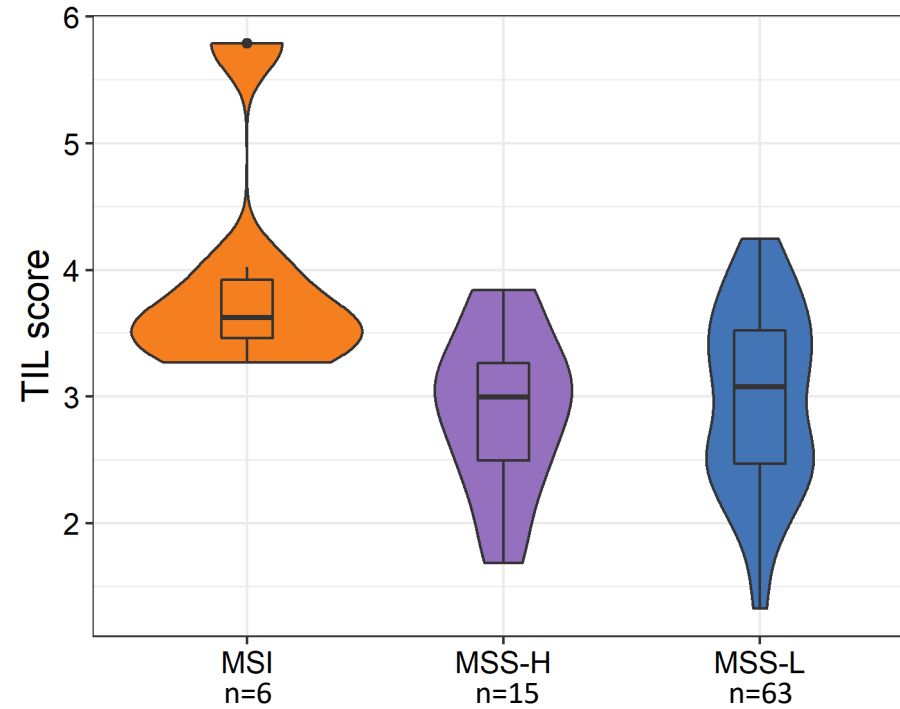

### Supplementary Figure 2: TIL score over MSI/TMB

Tumor infiltrating lymphocytes (TIL) score by Microsatellite Instable (MSI, n=6 or Stable (MSS, n=78) groups, the latter divided by tumor mutational burden (TMB) status: MSS-H (n=15) indicates a TMB>10, MSS-L (n=63) <10 per Mb. The box shows the 1st to 3rd quartile, the horizontal bar shows the median and whiskers extend to 95% of the distribution. The Kruskal-Wallis test was significant ( $p=0.037$ ) with the subsequent post-hoc analysis by Dunn's pairwise comparison resulting in Benjamini-Hochberg corrected  $p=0.012$  and  $p=0.021$  for MSI compared to MSS with high (MSS-H) and low TMB (MSS-L), respectively.

**Supplementary Table 1: Public cohorts**

| <b>Name</b> | <b>Mode</b>  | <b>Type</b>    | <b>N</b> | <b>Purpose</b>                          |
|-------------|--------------|----------------|----------|-----------------------------------------|
| TCGA-DFCI   | DNA          | primary CRC    | 1949     | compare gene mutation frequencies       |
| PCAWG       | WGS          | primary CRC    | 73       | compare mutational signatures           |
| Yaeger      | DNA-targeted | metastatic CRC | 321      | compare gene mutation frequencies       |
| ICGC        | DNA          | primary CRC    | 866      | compare non-coding mutation frequencies |

**Supplementary Table 2: Chromosomal regions vs. prior treatment**

|                                  |          | Prior treatment details     |                           |                   |                            |             |                      |                  |             |                 |
|----------------------------------|----------|-----------------------------|---------------------------|-------------------|----------------------------|-------------|----------------------|------------------|-------------|-----------------|
| Type of systemic prior treatment |          | Untreated<br>n=124          | Any pretreatment<br>n=284 | PLAT/PYR<br>n=121 | PLAT/PYR+targeted<br>n=134 | PYR<br>n=39 | PYR+targeted<br>n=36 | targeted<br>n=35 | TOP<br>n=67 | TOP/PYR<br>n=26 |
|                                  |          | Chromosomal details         |                           |                   |                            |             |                      |                  |             |                 |
| Alteration                       | Cytoband | Frequency of alteration (%) |                           |                   |                            |             |                      |                  |             |                 |
| Amplification Peak 3             | 6p22.1   | 34.7                        | 55.6                      | 58.7              | 60.4                       | 51.3        | 50.0                 | 51.4             | 55.2        | 61.5            |
| Amplification Peak 4             | 6p21.1   | 36.3                        | 58.8                      | 60.3              | 62.7                       | 61.5        | 47.2                 | 62.9             | 52.2        | 73.1            |
| Amplification Peak 13            | 11p15.5  | 31.5                        | 44.4                      | 42.1              | 47.8                       | 35.9        | 52.8                 | 48.6             | 58.2        | 42.3            |
| Amplification Peak 22            | 18p11.32 | 11.3                        | 30.6                      | 34.7              | 31.3                       | 33.3        | 30.6                 | 20.0             | 32.8        | 30.8            |
| Deletion Peak 3                  | 3p14.2   | 48.4                        | 63.7                      | 62.8              | 64.2                       | 59.0        | 50.0                 | 60.0             | 67.2        | 61.5            |
| Deletion Peak 8                  | 5q12.1   | 40.3                        | 53.5                      | 52.9              | 57.5                       | 51.3        | 58.3                 | 77.1             | 58.2        | 61.5            |
| Deletion Peak 11                 | 8p21.3   | 69.4                        | 82.4                      | 78.5              | 90.3                       | 74.4        | 80.6                 | 82.9             | 86.6        | 84.6            |
| Deletion Peak 24                 | 20p12.1  | 46.0                        | 58.1                      | 57.9              | 64.9                       | 69.2        | 55.6                 | 71.4             | 56.7        | 53.8            |

\* Significantly differential alteration frequencies compared to untreated patients are depicted in red (Chi-square test; FDR<0.05)

**Supplementary Table 3: Genes with decreased mutation**

| Gene    | Primary TCGA |      | Meta |     | Fisher<br>p-value | FDR<br>Hochberg | % Change<br>in meta |
|---------|--------------|------|------|-----|-------------------|-----------------|---------------------|
|         | N            | %    | N    | %   |                   |                 |                     |
| FCGBP   | 193          | 9.9  | 1    | 0.2 | 2.64E-16          | 1.22E-13        | -9.7                |
| MACF1   | 231          | 11.9 | 9    | 2.1 | 5.22E-12          | 2.42E-09        | -9.8                |
| GPR179  | 111          | 5.7  | 1    | 0.2 | 4.35E-09          | 2.00E-06        | -5.5                |
| MUC17   | 239          | 12.3 | 20   | 4.7 | 8.64E-07          | 3.97E-04        | -7.6                |
| AHNAK2  | 247          | 12.7 | 22   | 5.1 | 1.96E-06          | 9.01E-04        | -7.5                |
| FLG     | 363          | 18.6 | 41   | 9.6 | 2.42E-06          | 0.001           | -9.1                |
| DIDO1   | 168          | 8.6  | 11   | 2.6 | 2.52E-06          | 0.001           | -6.1                |
| IGF2R   | 132          | 6.8  | 7    | 1.6 | 6.37E-06          | 0.003           | -5.1                |
| AXIN2   | 132          | 6.8  | 7    | 1.6 | 6.37E-06          | 0.003           | -5.1                |
| FAM47C  | 122          | 6.3  | 6    | 1.4 | 8.36E-06          | 0.004           | -4.9                |
| FLNB    | 137          | 7.0  | 8    | 1.9 | 0.00001001        | 0.005           | -5.2                |
| BRWD3   | 108          | 5.5  | 5    | 1.2 | 0.00002402        | 0.011           | -4.4                |
| COL5A1  | 175          | 9.0  | 14   | 3.3 | 0.00002789        | 0.013           | -5.7                |
| RP1L1   | 151          | 7.7  | 11   | 2.6 | 0.00003062        | 0.014           | -5.2                |
| NFASC   | 133          | 6.8  | 9    | 2.1 | 0.00006445        | 0.029           | -4.7                |
| ANK3    | 194          | 10.0 | 18   | 4.2 | 0.00007292        | 0.033           | -5.8                |
| CHD4    | 160          | 8.2  | 13   | 3.0 | 0.00007946        | 0.036           | -5.2                |
| PCDHA9  | 107          | 5.5  | 6    | 1.4 | 0.00008121        | 0.036           | -4.1                |
| PDE4DIP | 151          | 7.7  | 12   | 2.8 | 0.00008232        | 0.037           | -5.0                |
| TENM1   | 199          | 10.2 | 19   | 4.4 | 0.00009019        | 0.040           | -5.8                |
| TEX15   | 138          | 7.1  | 10   | 2.3 | 0.00009045        | 0.040           | -4.7                |

P-values are derived from the Fisher's exact test (2-sided) and corrected for multiple testing using the FDR (Hochberg) method.

**Supplementary Table 4: MSI Genes**

| Gene     | Fisher p-value | Permutation p-value (1000 permutations) | FDR Hochberg | MSI Mutations (N) |            | Total Mutations (N) |            | Known target gene of MSI<br>(Kodelin et al, Cancer Res 2017; 77(15); 4078-88) |           |         |                 |
|----------|----------------|-----------------------------------------|--------------|-------------------|------------|---------------------|------------|-------------------------------------------------------------------------------|-----------|---------|-----------------|
|          |                |                                         |              | All               | Frameshift | All                 | Frameshift | position                                                                      |           |         |                 |
|          |                |                                         |              |                   |            |                     |            | chr                                                                           | (hg19)    | context | seqcontext      |
| ACVR2A   | 5.01E-14       | 0.001                                   | 1.61E-11     | 11                | 11         | 23                  | 15         | 2                                                                             | 148683686 | A8      | catAAAAAAAAAgag |
| UBR5     | 9.45E-13       | 0.002                                   | 3.02E-10     | 10                | 9          | 20                  | 9          | 8                                                                             | 103289349 | T8      | ttcTTTTTTTgcc   |
| HERC2    | 1.46E-11       | 0.003                                   | 4.67E-09     | 11                | 3          | 35                  | 4          |                                                                               |           |         |                 |
| KMT2D    | 2.61E-11       | 0.001                                   | 8.30E-09     | 10                | 7          | 26                  | 8          |                                                                               |           |         |                 |
| KCNMA1   | 8.76E-11       | 0.002                                   | 2.78E-08     | 9                 | 5          | 20                  | 5          |                                                                               |           |         |                 |
| RYR1     | 5.78E-10       | 0.01                                    | 1.83E-07     | 11                | 0          | 47                  | 0          |                                                                               |           |         |                 |
| UBR4     | 1.02E-09       | 0.009                                   | 3.21E-07     | 9                 | 0          | 25                  | 0          |                                                                               |           |         |                 |
| TNRC18   | 2.30E-09       | 0.009                                   | 7.21E-07     | 9                 | 0          | 27                  | 0          |                                                                               |           |         |                 |
| RNF213   | 3.35E-09       | 0.014                                   | 1.05E-06     | 9                 | 3          | 28                  | 5          |                                                                               |           |         |                 |
| FSIP2    | 4.73E-09       | 0.041                                   | 1.48E-06     | 11                | 6          | 56                  | 9          |                                                                               |           |         |                 |
| NCAM1    | 5.35E-09       | 0.006                                   | 1.66E-06     | 8                 | 7          | 20                  | 7          |                                                                               |           |         |                 |
| STAB2    | 5.35E-09       | 0.005                                   | 1.66E-06     | 8                 | 0          | 20                  | 0          |                                                                               |           |         |                 |
| KMT2C    | 6.82E-09       | 0.017                                   | 2.11E-06     | 9                 | 5          | 30                  | 8          |                                                                               |           |         |                 |
| LRP2     | 1.08E-08       | 0.042                                   | 3.32E-06     | 10                | 5          | 44                  | 7          |                                                                               |           |         |                 |
| SPTBN4   | 1.33E-08       | 0.014                                   | 4.07E-06     | 8                 | 0          | 22                  | 0          |                                                                               |           |         |                 |
| LAMA1    | 1.33E-08       | 0.009                                   | 4.07E-06     | 8                 | 0          | 22                  | 0          |                                                                               |           |         |                 |
| ZNF469   | 6.21E-08       | 0.045                                   | 1.88E-05     | 8                 | 5          | 26                  | 5          |                                                                               |           |         |                 |
| DOCK3    | 8.73E-08       | 0.049                                   | 2.63E-05     | 8                 | 7          | 27                  | 7          |                                                                               |           |         |                 |
| FAT1     | 8.73E-08       | 0.04                                    | 2.63E-05     | 8                 | 3          | 27                  | 6          |                                                                               |           |         |                 |
| TNXB     | 1.21E-07       | 0.044                                   | 3.55E-05     | 8                 | 0          | 28                  | 0          |                                                                               |           |         |                 |
| KIF26B   | 1.21E-07       | 0.044                                   | 3.55E-05     | 8                 | 0          | 28                  | 0          |                                                                               |           |         |                 |
| DNAH17   | 1.21E-07       | 0.049                                   | 3.55E-05     | 8                 | 0          | 28                  | 0          |                                                                               |           |         |                 |
| NIPBL    | 2.23E-07       | 0.025                                   | 6.52E-05     | 7                 | 0          | 20                  | 0          |                                                                               |           |         |                 |
| BTBD11   | 3.31E-07       | 0.048                                   | 9.53E-05     | 7                 | 5          | 21                  | 5          |                                                                               |           |         |                 |
| LTBP2    | 3.31E-07       | 0.042                                   | 9.53E-05     | 7                 | 5          | 21                  | 5          |                                                                               |           |         |                 |
| LRP1     | 3.31E-07       | 0.034                                   | 9.53E-05     | 7                 | 0          | 21                  | 0          |                                                                               |           |         |                 |
| ADAMTS18 | 4.79E-07       | 0.042                                   | 1.37E-04     | 7                 | 3          | 22                  | 5          |                                                                               |           |         |                 |
| AHNAK2   | 4.79E-07       | 0.047                                   | 1.37E-04     | 7                 | 0          | 22                  | 0          |                                                                               |           |         |                 |

P-values are derived from the Fisher's exact test, the permutation test, and corrected for multiple testing using the FDR (Hochberg) method.
