# Supplementary material for: Whole genome sequencing of metastatic colorectal cancer reveals prior treatment effects and specific metastasis features
Source: PubMed Central journal article supplement (PMC7835235; doi:10.1038/s41467-020-20887-6), 2021-01-25
Supplement: 41467_2020_20887_MOESM3_ESM.pdf [file 41467_2020_20887_MOESM3_ESM.pdf]

## **Description of Additional Supplementary Files**

File Name: Supplementary Data 1

Description: List of Affected chromosomal regions (GISTIC)

File Name: Supplementary Data 2

Description: Prior treatment signatures

File Name: Supplementary Data 3

Description: Input data treatment outcome analysis
